# Supplementary material for: Pembrolizumab in patients with rare ovarian cancers : analysis from AcSé Pembrolizumab phase II multicentric basket trial
Source: Research Square preprint supplement (doi:10.21203/rs.3.rs-7752410/v1), 2025-10-05
Supplement: Supplementary file 1 [file 5691af06d2e008e24e0ca721.pdf]

Supplementary Table 2. Description of treatment cycles

|                                                       | <b>All patients, N = 62 (100%)</b> |
|-------------------------------------------------------|------------------------------------|
| Number of cycles, median (range)                      | 5 (4 - 8)                          |
| End of treatment, n (%)                               |                                    |
| No                                                    | 1 (1.6)                            |
| Yes                                                   | 61 (98.4)                          |
| Reasons for end of treatment, n (%)                   |                                    |
| Death                                                 | 2 (3.2)                            |
| Progressive disease                                   | 47 (75.8)                          |
| Patient decision                                      | 2 (3.2)                            |
| Physician decision                                    | 2 (3.2)                            |
| Protocol treatment duration                           | 3 (4.8)                            |
| Toxicity adverse event                                | 5 (8.1)                            |
| Other                                                 | 1 (1.6)                            |
| Study dropout, n (%)                                  |                                    |
| No                                                    | 0 (0)                              |
| Yes                                                   | 62 (100)                           |
| Reasons for study dropout, n (%)                      |                                    |
| Death                                                 | 32 (51.6)                          |
| End of protocol and all the follow-up visit performed | 28 (45.2)                          |
| Lost to follow-up                                     | 1 (1.6)                            |
| Withdrawal by subject                                 | 1 (1.6)                            |
