# Supplementary material for: Pembrolizumab in patients with rare ovarian cancers : analysis from AcSé Pembrolizumab phase II multicentric basket trial
Source: Research Square preprint supplement (doi:10.21203/rs.3.rs-7752410/v1), 2025-10-05
Supplement: Supplementary file 5 [file baf111577ee4ab2dfd6b4a04.pdf]

Supplementary Table 3. Overall response rate at week 12 in the intention-to-treat population according to detailed histology

|                                            |         |
|--------------------------------------------|---------|
| Overall response rate by histotype, No (%) |         |
| Carcinosarcoma                             | 4       |
| Stable disease                             | 1(25)   |
| Progressive disease                        | 1 (25)  |
| Not evaluable                              | 2 (50)  |
| Clear cell                                 | 10      |
| Partial response                           | 0       |
| Stable disease                             | 4 (40)  |
| Progressive disease                        | 4 (40)  |
| Not evaluable                              | 2 (20)  |
| Germ cell tumours                          | 2       |
| Complete response                          | 1 (50)  |
| Progressive disease                        | 1 (50)  |
| Low-grade serous carcinoma                 | 23      |
| Partial response                           | 1 (4)   |
| Stable disease                             | 10 (43) |
| Progressive disease                        | 10 (43) |
| Not evaluable                              | 2 (9)   |
| Mucinous carcinoma                         | 5       |
| Stable disease                             | 2 (40)  |
| Progressive disease                        | 2 (40)  |
| Not evaluable                              | 1 (20)  |
| Sex cord-stromal tumours                   | 14      |
| Stable disease                             | 4 (29)  |
| Progressive disease                        | 9 (64)  |
| Not evaluable                              | 1 (7)   |
| Small cell carcinoma                       | 4       |
| Progressive disease                        | 3 (80)  |
| Not evaluable                              | 1 (25)  |
