# Supplementary material for: Pembrolizumab in patients with rare ovarian cancers : analysis from AcSé Pembrolizumab phase II multicentric basket trial
Source: Research Square preprint supplement (doi:10.21203/rs.3.rs-7752410/v1), 2025-10-05
Supplement: Supplementary file 6 [file d19e4d69916c8c22c5a08981.pdf]

## PROCOLE AcSé PEMBROLIZUMAB

N° Essai UC : UC-0105/1612  
N° EudraCT: 2016-002260-14

**Accès sécurisé au Pembrolizumab pour des patients  
porteurs de certains types de cancers rares**

Version n°8.0 – 07 septembre 2020

### NOTE D'INFORMATION ET CONSENTEMENT

|                                        |                                                                                                                                                                                                                                |
|----------------------------------------|--------------------------------------------------------------------------------------------------------------------------------------------------------------------------------------------------------------------------------|
| <b>INVESTIGATEUR<br/>COORDONNATEUR</b> | <b>Dr Christophe Massard</b><br>Gustave Roussy Cancer Campus,<br>114, rue Edouard Vaillant, 94805, Villejuif, FRANCE<br>Tel.: +33 (0)1 42 11 43 38<br>Fax: +33 (0)1 41 11 53 05<br>Email: christophe.massard @gustaveroussy.fr |
| <b>PROMOTEUR</b>                       | <b>UNICANCER</b><br>101, rue de Tolbiac - 75654 PARIS CEDEX 13 - FRANCE<br>Tel. +33.(0)1.44.23.04.04 - Fax: +33.(0)1.44.23.55.69                                                                                               |

**NOTE D'INFORMATION DESTINÉE AUX PERSONNES PARTICIPANT AU PROTOCOLE DE RECHERCHE IMPLIQUANT LA PERSONNE HUMAINE **AcSé PEMBROLIZUMAB****

## **Accès sécurisé au Pembrolizumab pour des patients porteurs de certains types de cancers rares**

Madame, Monsieur,

Votre médecin vous suit actuellement dans le cadre de la prise en charge de votre cancer. Il vous propose de participer à une étude de recherche impliquant la personne humaine concernant le traitement de votre maladie. Ce document décrit l'étude à laquelle il vous propose de participer. Il résume le déroulement de l'étude, ses objectifs, ses éventuels bénéfices et inconvénients.

**Votre participation à cette étude est totalement volontaire.** Votre acceptation ou votre refus ne modifiera en rien les rapports que vous aurez avec votre médecin. Celui-ci continuera de vous proposer les soins qui lui paraissent les plus adaptés à votre état de santé. Si vous acceptez de participer à cette étude, vous avez la possibilité d'interrompre le traitement à tout moment. De même, votre médecin gardera la possibilité d'interrompre le traitement s'il juge que c'est dans votre intérêt.

Avant de prendre votre décision, prenez le temps de comprendre les objectifs de cette étude, ce qu'elle implique, les éventuels bénéfices, risques et gênes qu'elle pourrait vous occasionner. Nous vous recommandons de bien lire ce document d'information et si vous le souhaitez, d'en discuter avec votre famille, des amis et votre médecin traitant. N'hésitez pas à contacter le médecin investigateur en charge de cette étude si vous souhaitez avoir des précisions sur certains points ou si vous désirez de plus amples renseignements (coordonnées en page 19).

## Sommaire

|                                                                                                        |    |
|--------------------------------------------------------------------------------------------------------|----|
| 1. Quel est l'objectif de la recherche? .....                                                          | 4  |
| 2. Qui mène cette étude? .....                                                                         | 4  |
| 3. Qui participera à cette étude ? Pourquoi ai-je été choisi(e) ? .....                                | 4  |
| 4. Quel est le déroulement de cette étude ? .....                                                      | 5  |
| 5. Quels sont les bénéfices attendus ? .....                                                           | 8  |
| 6. Quels sont les risques prévisibles ? .....                                                          | 9  |
| 7. Pourquoi réaliser et conserver des prélèvements biologiques ? .....                                 | 13 |
| 8. Qu'en est-il de la contraception, et de la survenue d'une grossesse au cours de cette étude ?<br>14 |    |
| 9. Est-il possible de prendre d'autres médicaments pendant l'étude ? .....                             | 15 |
| 10. Quels sont mes droits en tant que participant à cette recherche ? .....                            | 15 |
| 11. Serais-je informé des résultats de l'étude ? .....                                                 | 16 |
| 12. De quelle protection bénéficierai-je dans le cadre de cette étude ? .....                          | 16 |
| 12.1 Sécurité, éthique et prise en charge .....                                                        | 16 |
| 13. Aspect confidentiel des données .....                                                              | 17 |
| 14. A qui dois-je m'adresser en cas de questions ou de problèmes ? .....                               | 19 |
| 15. Tableau récapitulatif des investigations .....                                                     | 20 |
| 16. Lexique .....                                                                                      | 22 |

## 1. Quel est l'objectif de la recherche?

Le **Pembrolizumab** (KEYTRUDA®) est un médicament développé par le laboratoire pharmaceutique Merck Sharp & Dohme. Il est autorisé par les autorités de santé dans le traitement des adultes atteints d'un cancer de la peau (mélanome), le cancer du poumon, et le lymphome d'Hodgkin.

Un certain nombre de données médicales laissent penser que ce médicament pourrait aussi être actif dans d'autres types de cancers. C'est pourquoi l'objectif principal de cette recherche biomédicale est de **tester si le Pembrolizumab administré seul est un traitement efficace contre différents types de cancers rares** qui sont résistants aux traitements standards.

Des signaux biologiques et génétiques (appelés biomarqueurs) seront recherchés au cours de cette étude. Ces biomarqueurs permettront aux médecins de mieux définir les caractéristiques des patients qui pourraient bénéficier d'un traitement par Pembrolizumab. Dans cet objectif, des analyses génétiques seront réalisées sur des échantillons de votre tumeur et sur des échantillons de sang qui seront collectés tout au long de l'étude.

## 2. Qui mène cette étude?

Cette étude est conduite par UNICANCER (dit le « promoteur » de l'étude) structure à but non-lucratif qui développe et met en œuvre des essais cliniques en France en collaboration avec les médecins-chercheurs spécialisés dans le traitement du cancer. Cette étude est financée par l'Institut National du Cancer (INCa), la Ligue Nationale Contre le Cancer et le laboratoire pharmaceutique Merck Sharp & Dohme.

## 3. Qui participera à cette étude ? Pourquoi ai-je été choisi(e) ?

Nous proposons cette étude à des patients ayant certains types de cancer considérés comme rares :

- Sarcomes rares,
- Cancer rare des ovaires,
- Lymphome primitif du système nerveux central,
- Cancer rare de la thyroïde,
- Tumeur neuroendocrine rare,
- Cancer des cellules germinales (les cellules qui sont susceptibles de former des spermatozoïdes et ovocytes).
- Lymphome des cellules NK ou T (les cellules du système immunitaire qui circule dans votre sang)

Il est prévu d'inclure 20 à 50 patients pour chaque type de cancer à l'exception de la cohorte Sarcome pour laquelle 30 patients supplémentaires seront inclus s'ils présentent un des types de sarcome listés ci-dessous :

- Sarcome alvéolaire des parties molles ou
- Chordome ou
- Tumeurs rhabdoides SMARCA4- ou
- Tumeurs desmoplastiques à petites cellules rondes.

Il est prévu d'inclure jusqu'à 50 patients supplémentaires répartis dans les cohortes Sarcome, Cancer rare des ovaires et Lymphome primitif du système nerveux central s'ils présentent un des types de cancers particuliers listés ci-dessous :

- Sarcome alvéolaire des parties molles, Chordome, Tumeur rhabdoïde SMARCA4-, Tumeur desmoplastique à petites cellules rondes dans la cohorte Sarcome, ou
- Tératome cancérisé, Carcinome séreux de bas grade, Carcinome à petites cellules de type hypercalcémiant dans la cohorte Ovaire ou
- Lymphome cérébraux dans la cohorte lymphome primitif du système nerveux central.

L'efficacité du Pembrolizumab sera évaluée séparément pour chaque type de cancer après que 10 patients aient été traités. Si, parmi ces 10 patients, il y a suffisamment d'informations montrant un bénéfice du traitement, l'équipe médicale inclura d'autres patients atteints de la même maladie pour confirmer ces résultats. Si par contre il n'y a pas de réponse évidente au traitement, l'équipe arrêtera le recrutement de patients pour cette maladie.

#### 4. Quel est le déroulement de cette étude ?

Cette étude se déroulera en 4 étapes (cf. schéma suivant) :

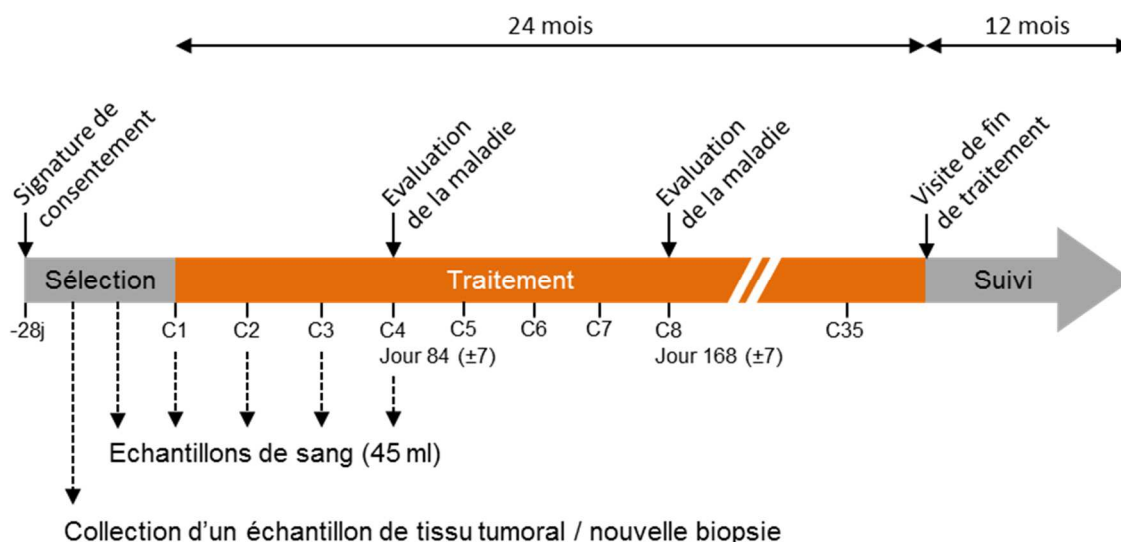

#### Phase de sélection :

Une fois que le médecin investigateur aura répondu à toutes vos questions et après vous avoir laissé un temps de lecture et de réflexion, si vous souhaitez participer à cette étude, il vous sera demandé de dater et signer le formulaire de consentement qui se trouve à la fin de cette note d'information. Votre participation à cette étude ne sera confirmée qu'après validation d'un ensemble de critères prévus par le protocole. Vous devrez vous rendre à l'hôpital afin que le médecin investigateur puisse vérifier que vous pouvez participer à l'étude en réalisant :

- La revue de vos antécédents médicaux, de vos symptômes et de vos traitements actuels.
- Un examen médical conforme à la pratique usuelle.
- Une prise de sang pour une analyse hématologique et biochimique et la réalisation du dépistage de l'hépatite B et C et du VIH. Ces analyses (sérologies) doivent être effectuées avant le début de l'étude. Il est possible que deux prises de sang soient nécessaires. Les résultats du test de dépistage pourront vous être remis par le médecin de votre choix.
- Un électrocardiogramme pour mesurer l'activité électrique de votre cœur et ainsi vérifier son fonctionnement normal.

*Document en double : conserver l'original signé dans le classeur investigateur et remettre le double au participant à la recherche*

- Un test de grossesse dans les 24 heures qui précèdent la première administration de Pembrolizumab si vous êtes une femme en âge d'avoir des enfants. Le test devra être négatif pour que vous puissiez participer à cette étude
- **Si vous avez un cancer sur un organe autre que le sang (on parle de tumeur solide):**
  - Un examen radiologique (scanner spiralé, IRM - imagerie par résonnance magnétique-, ou un autre examen plus approprié à votre cancer) afin d'évaluer votre maladie.
  - Une évaluation clinique de votre tumeur
- **Si vous avez un lymphome primitif du système nerveux central :**
  - Différents examens radiologiques (IRM, ou un autre examen en cas de contre-indication, pour la tête et scanner pour le thorax, abdomen, pelvis)
  - Un examen ophtalmologique approfondi
  - Une ponction lombaire pour étudier les cellules qui se trouvent dans le liquide cérébro-spinal.
- **Si vous avez un lymphome des cellules NK ou T:**
  - Un examen par tomographie par émission de positons (dit « TEP ») couplé avec un scanner spiralé
  - Une ponction lombaire pour étudier les cellules qui se trouvent dans le liquide cérébro-spinal.
  - Une biopsie de votre moelle osseuse ou un myélogramme pour étudier les cellules qui se trouvent dans votre moelle
  - Une prise de sang supplémentaire afin de mesurer la quantité d'anticorps contre le virus *Epstein-Barr* dans le sang (un facteur qui peuvent témoigner d'une évolutivité du lymphome)
  - Une évaluation clinique de votre tumeur

Si vous ne présentez pas certains critères requis, vous ne pourrez pas participer à l'étude et ne recevrez pas le traitement par Pembrolizumab. Dans ce cas, votre médecin discutera avec vous des alternatives thérapeutiques possibles.

A l'issue de ces examens, si vous êtes éligible à l'étude, votre médecin prélèvera à nouveau un échantillon de sang (45 ml au total dans 4-5 tubes, l'équivalent de 3 cuillères à soupe).

Si un échantillon de votre tumeur est disponible à l'hôpital il sera collecté pour être utilisé dans l'étude. S'il n'y a pas d'échantillon disponible, une nouvelle biopsie, c'est-à-dire le prélèvement d'un petit fragment de la tumeur, sera réalisé avant le début de votre traitement par Pembrolizumab. Le prélèvement collecté sera ensuite envoyé (de manière confidentielle) à un laboratoire central en France pour les analyses biologiques et génétiques.

Vos échantillons sanguins ou tumoraux seront stockés et transmis à des partenaires d'Unicancer, en France ou à l'étranger, pour répondre aux questions de cette étude. Ces échantillons pourront aussi être utilisés dans d'autres études à des fins de recherche dans le domaine de l'oncologie, sauf si vous vous y opposez.

**Phase de traitement :**

Vous devrez venir à l'hôpital toutes les trois semaines pour recevoir votre traitement.

A chaque visite le Pembrolizumab vous sera administré en perfusion intraveineuse pendant une durée de 30 minutes toutes les 21 jours. Vous recevrez une dose fixe de traitement de 200 mg à chaque administration.

Vous devez appeler immédiatement votre médecin investigateur si vous subissez des désagréments et/ou un effet indésirable pendant ou après la perfusion.

Lors de vos visites à l'hôpital pendant la phase de traitement les examens suivants seront effectués avant l'administration du Pembrolizumab :

- Un examen clinique pour l'évaluation de votre état général ;
- Une prise de sang pour une analyse hématologique et biochimique;
- Pour les patients ayant un cancer des cellules germinales, un dosage des marqueurs tumoraux sera réalisé à partir de la 2<sup>ème</sup> administration ;
- Le recueil des effets secondaires et autres symptômes. Si ces symptômes surviennent, ils seront pris en charge, puis suivis jusqu'à leur guérison ou stabilisation ;
- Le recueil des autres médicaments que vous aurez pris depuis la dernière visite.

Après les quatre premières administrations du traitement, un échantillon de votre sang (45 mL) sera prélevé.

Un examen radiologique sera effectué tous les 3 mois afin d'évaluer l'évolution de votre maladie.

Si vous avez un lymphome primitif du système nerveux central un examen ophtalmologique, ou une ponction lombaire pour examiner le liquide cérébro-spinal pourraient aussi être proposés au moment de l'examen radiologique, selon vos symptômes et les résultats des examens réalisés pendant la phase de sélection.

Si vous avez un lymphome des cellules NK ou T l'examen radiologique inclura un examen TEP couplé avec un scanner spiral. Une prise de sang sera effectuée afin de mesurer la quantité d'anticorps contre le virus *Epstein-Barr*. Une ponction lombaire, biopsie de la moelle osseuse ou myélogramme pourraient aussi être proposés au moment de l'examen radiologique, selon vos symptômes et les résultats des examens réalisés pendant la phase de sélection.

Vous serez traité(e) pendant 24 mois au maximum. Au cours de cette période, le Pembrolizumab pourra être arrêté en fonction de l'évolution de votre maladie ou si vous ne le tolérez pas correctement.

Vous pourrez également décider d'arrêter le traitement par Pembrolizumab à tout moment pour toute autre raison.

**Visite de fin de traitement**

Une visite sera réalisée à l'hôpital avec le médecin investigateur après l'arrêt du Pembrolizumab, dans le mois suivant l'arrêt du traitement.

Lors de cette visite, seront effectués :

- Un examen clinique pour l'évaluation de votre état général ;
- Le recueil des effets ou événements indésirables ;

- Le recueil des autres médicaments que vous aurez pris depuis la dernière visite ;
- Une prise de sang pour une analyse hématologique et biochimique ;
- Un examen radiologique (utilisant les mêmes techniques qu'à la visite de sélection) pourra être effectué s'il n'a pas été fait dans le mois précédent l'arrêt du traitement. Si vous avez un lymphome primitif du système nerveux central un examen ophtalmologique, ou une ponction lombaire pour examiner le liquide cérébro-spinal pourraient aussi être proposés au moment de l'examen radiologique. Si vous avez un lymphome des cellules NK ou T l'examen radiologique inclura un examen TEP couplé avec un scanner spiral. Une prise de sang sera effectuée afin de mesurer la quantité d'anticorps contre le virus *Epstein-Barr*. Une ponction lombaire, biopsie de la moelle osseuse ou myélogramme pourraient aussi être proposés.

### **Phase de suivi (après l'arrêt du Pembrolizumab)**

Votre médecin investigateur prendra des nouvelles de votre état lors de consultations faites dans le cadre de votre traitement, pendant 12 mois maximum après l'arrêt du Pembrolizumab. Lors de ces visites, les informations suivantes seront collectées :

- Un examen clinique pour l'évaluation de votre état général ;
- Le suivi des symptômes survenus pendant la période de traitement ;
- La prise de nouveaux médicaments pour traiter votre cancer.
- Si votre maladie ne s'est pas aggravée pendant le traitement, un examen radiologique sera effectué tous les 3 mois afin de surveiller son évolution. Si vous avez un lymphome primitif du système nerveux central un examen ophtalmologique, ou une ponction lombaire pour examiner le liquide cérébro-spinal pourraient aussi être proposés au moment de l'examen radiologique. Si vous avez un lymphome des cellules NK ou T l'examen radiologique inclura un examen TEP couplé avec un scanner spiral. Une prise de sang sera effectuée afin de mesurer la quantité d'anticorps contre le virus *Epstein-Barr*. Une ponction lombaire, biopsie de la moelle osseuse ou myélogramme pourraient aussi être proposés.
- Si votre maladie s'est aggravée pendant le traitement, l'examen radiologique réalisé avant votre inclusion dans cette étude pourra être récupéré afin d'évaluer cette aggravation.

*Un tableau récapitulatif des investigations prévues à chaque visite est disponible à la fin de ce document (page 20)*

## **5. Quels sont les bénéfices attendus ?**

Le médicament expérimental de l'étude, le Pembrolizumab, a déjà été testé pour différents cancers contre lesquels il a montré son efficacité. Néanmoins, son efficacité n'est pas garantie dans le traitement de votre cancer et personne ne peut vous assurer que vous obtiendrez personnellement un bénéfice à votre participation dans cette étude. Votre état de santé peut ne pas s'améliorer voire même s'aggraver pendant que vous êtes dans l'étude.

Les informations et connaissances obtenues durant cette étude pourront faire progresser la recherche et être utiles à d'autres patients dans le futur.

## 6. Quels sont les risques prévisibles ?

### Risques associés au traitement (Pembrolizumab)

Le pembrolizumab agit en aidant votre système immunitaire à combattre votre cancer. Cependant, le pembrolizumab peut aussi conduire votre système immunitaire à attaquer des organes et des tissus normaux dans votre organisme, ce qui peut affecter leur fonctionnement et causer des effets indésirables pouvant devenir graves, c'est-à-dire conduire à une hospitalisation, menacer le pronostic vital, et dans certains cas, entraîner le décès.

#### ***Effets indésirables très fréquents :***

Sur 100 personnes recevant le pembrolizumab, il est possible qu'au moins 20 personnes présenteront les effets indésirables suivants :

- Démangeaisons cutanées
- Selles molles ou liquides
- Toux

#### ***Effets indésirables fréquents :***

Sur 100 personnes recevant le pembrolizumab, il est possible qu'entre 5 et 20 personnes présenteront les effets indésirables suivants :

- Douleurs articulaires
- Eruption cutanée (rash)
- Fièvre
- Mal de dos
- Douleurs abdominales
- Décoloration de la peau
- Faible taux d'hormones thyroïdiennes pouvant se manifester chez vous par une sensation de fatigue, une prise de poids, une sensation de froid, des selles peu fréquentes ou dures.
- Faible quantité de sel dans le sang pouvant entraîner une sensation de fatigue, une confusion, des maux de tête, des crampes musculaires et/ou des maux d'estomac (hyponatrémie).

#### ***Effets indésirables peu fréquents :***

Sur 100 personnes recevant le pembrolizumab, il est possible qu'entre 1 et 5 personnes présenteront les effets indésirables suivants :

- Inflammation des poumons pouvant se manifester par un essoufflement et une toux (pneumonie).
- Taux trop élevé d'hormones thyroïdiennes pouvant se manifester chez vous par un sentiment d'anxiété, de colère, des troubles du sommeil, une sensation de faiblesse, de tremblements, de transpiration, une sensation de fatigue, des selles molles et liquides (hyperthyroïdisme).

- Réaction à la perfusion pouvant se manifester par une sensation d'étourdissement ou d'évanouissement, des bouffées de chaleurs, une éruption cutanée, de la fièvre, une sensation d'essoufflement, une baisse de la tension artérielle pendant la perfusion (IV) ou juste après, ou une douleur au site de perfusion.
- Inflammation des intestins pouvant se manifester par des douleurs abdominales sévères avec des selles molles ou liquides, et des selles noires, goudronneuses et collantes ou des selles contenant du sang ou du mucus (colite). Inflammation de la peau pouvant se manifester par une desquamation (peau qui pèle), des démangeaisons et/ou des rougeurs cutanées. L'inflammation de la peau, (c'est-à-dire, desquamation, démangeaisons et rougeurs) pourrait aussi s'étendre à tout le corps. Des réactions cutanées plus graves peuvent affecter l'intérieur de votre bouche, la surface de vos yeux et de vos parties génitales et/ou conduire à une desquamation de la couche supérieure de votre peau sur l'ensemble de votre corps pouvant entraîner une grave infection (réactions cutanées sévères, y compris le syndrome de Stevens-Johnson ou la nécrolyse épidermique toxique).

### **Effets indésirables rares :**

Moins d'une personne sur 100 recevant le pembrolizumab a présenté les effets indésirables suivants:

- Inflammation des nerfs pouvant entraîner des douleurs, une faiblesse ou des picotements dans vos mains et vos pieds, pouvant se répandre dans vos jambes, vos bras et le haut du corps entraînant une grande faiblesse musculaire et une possible paralysie temporaire (syndrome de Guillain-Barré).
- Inflammation des muscles pouvant entraîner une sensation de faiblesse ou des douleurs musculaires (myosite).
- Inflammation du pancréas (glande de votre abdomen qui contrôle le niveau de sucre) pouvant vous faire ressentir une douleur sévère dans le haut du ventre qui peut se déplacer vers le dos, vous donner des maux d'estomac et des vomissements qui s'aggravent lorsque vous mangez (pancréatite).
- Inflammation des yeux pouvant entraîner chez vous une rougeur des yeux, une vision trouble, une sensibilité à la lumière, une douleur oculaire, la vision de corps flottants, ou des maux de tête (uvéite).
- Inflammation du foie pouvant entraîner des maux d'estomac et des vomissements, un manque d'appétit, une sensation de fatigue, une légère fièvre, une douleur du côté droit du ventre, un jaunissement des yeux et de la peau et une urine foncée (hépatite).
- Inflammation de l'hypophyse (glande présente dans la tête) pouvant entraîner des maux d'estomac ou des maux de tête, des changements dans votre comportement, une vision double, réduire ou arrêter vos cycles menstruels, entraîner une faiblesse, des vomissements et des étourdissements ou des évanouissements (hypophysite).
- Les glandes surrénales (glandes situées au-dessus des reins) pouvant ne pas fabriquer suffisamment d'hormones ce qui pourrait entraîner une fatigue, une perte de poids, une faiblesse musculaire, une sensation de faiblesse, des douleurs articulaires et musculaires, des nausées, des vomissements, des selles molles ou liquides, de la fièvre, un manque de sel, parfois un brunissement de la peau évoquant le bronzage (insuffisance surrénalienne).

- Diabète de type 1, un état pouvant entraîner un taux de sucre trop élevé dans le sang, une sensation de soif plus importante qu'à l'habitude, une envie d'uriner plus fréquente et une perte de poids. Vous pourriez nécessiter des injections régulières d'insuline.
- Inflammation des reins pouvant se manifester par une diminution de votre besoin d'uriner ou des urines troubles ou la présence de sang dans vos urines, des gonflements et des douleurs dans le bas de votre dos (néphrite).
- Inflammation de la couche intermédiaire de la paroi cardiaque pouvant conduire votre cœur à avoir des difficultés à pomper le sang dans votre corps et pouvant entraîner une douleur dans la poitrine, un essoufflement, et des gonflements des jambes. Vous pourriez également avoir un rythme cardiaque plus élevé ou irrégulier pouvant conduire à des vertiges ou pertes de connaissance (myocardite).
- Inflammation de la glande thyroïde, un organe qui sécrète et stocke les hormones thyroïdiennes. Cet état peut conduire à un changement de votre rythme cardiaque, de votre tension artérielle, de la température de votre corps et de la vitesse à laquelle les aliments sont convertis en énergie (thyroïdite).
- Un état qui peut vous donner une sensation de faiblesse et de fatigue et pouvant entraîner un affaissement des paupières, une vision trouble ou double, des difficultés à avaler, des troubles de l'élocution, une faiblesse dans vos bras et vos jambes ou des difficultés à respirer (syndrome myasthénique / myasthénie grave avec exacerbation).
- Formation de petites grappes de cellules immunitaires, (appelées granulomes) dans des parties de votre organisme comme les ganglions lymphatiques, les yeux, la peau ou les poumons (sarcoïdose). Inflammation du cerveau s'accompagnant de confusion et de fièvre. Cela peut aussi inclure : une désorientation, des problèmes de mémoire, des convulsions (spasmes), des changements de personnalité et de comportement, une difficulté d'élocution, une faiblesse ou perte de mouvements dans certaines parties du corps et une perte de conscience (encéphalite). Inflammation de la moelle épinière avec douleur, engourdissement, picotements ou faiblesse dans les bras ou les jambes, problèmes de vessie ou d'intestin, y compris besoin d'uriner plus fréquemment, incontinence urinaire, difficulté à uriner et constipation (myélite).

De plus, depuis l'approbation du pembrolizumab en septembre 2014, les effets indésirables suivants ont été rapportés par les personnes recevant du pembrolizumab.

Ces effets indésirables ont été signalés chez un groupe de taille inconnue de personnes. Il n'est pas possible d'estimer la fréquence de cet effet secondaire :

- Inflammation des articulations pouvant inclure des douleurs articulaires, une raideur et / ou un gonflement (arthrite). Réponses sévères du système immunitaire qui poussent le corps à attaquer ses propres cellules sanguines, la rate, le foie, les ganglions lymphatiques, la peau et le cerveau. Cela peut inclure de la fièvre, des éruptions cutanées, une inflammation du foie, un jaunissement de la peau, une hypertrophie du foie et de la rate, une faible numération sanguine et une hypertrophie des ganglions lymphatiques. Le système nerveux peut également être affecté et provoquer une confusion, des convulsions et même un coma (lymphohistiocytose hémophagocytaire).
- Modifications de la vue, douleur oculaire, taches blanchâtres sur la peau et perte auditive (syndrome de Vogt-Koyanagi-Harada).

Si vous avez un lymphome (ou autre cancer du sang) il y a un risque augmenté de complications sévères si vous recevez une greffe de cellules souche provenant d'un donneur (dit « allogreffe ») à la suite de votre traitement par pembrolizumab. Certains cas de coagulation du sang à l'intérieur du

*Document en double : conserver l'original signé dans le classeur investigateur et remettre le double au participant à la recherche*

foie et de graves réactions du greffon contre l'hôte (qui peuvent inclure des symptômes cutanés, hépatiques et gastro-intestinaux), dont certains ont entraîné le décès, ont été déclarés chez des patients ayant reçu une allogreffe de cellules souches après un traitement par le pembrolizumab. Vous devriez informer votre médecine que vous avez reçu un traitement par pembrolizumab avant de recevoir une greffe.

### Risques associés aux examens spécifiques de l'étude

Les procédures de l'étude sont conformes à la prise en charge usuelle de votre cancer donc l'inconfort et les inconvénients devraient être minimes.

Les prises de sang ou l'utilisation d'un cathéter peuvent avoir les effets indésirables suivants : infection, bleus, rougeur, inconfort ou saignement au point de piqure.

Pour les biopsies, une anesthésie locale permet d'effectuer le geste sans douleur. Il peut néanmoins apparaître une gêne sur le point de prélèvement une fois les effets de l'anesthésie passés. Il y a aussi le risque qu'un bleu se développe sur la zone prélevée, voire un risque hémorragique plus important avec baisse de la tension artérielle. Dans de rares cas, des problèmes plus sévères peuvent aussi survenir, par exemple : une sensation de malaise, l'apparition d'un pneumothorax (présence d'air entre les poumons et la paroi thoracique si la biopsie est pulmonaire), ou le développement d'une infection sur le site de la biopsie pouvant donner lieu à un abcès, voire de façon exceptionnelle à une septicémie (infection du sang). N'hésitez pas à aborder ces aspects avec votre médecin qui fera le nécessaire pour améliorer votre confort et s'assurera que tout problème est pris en charge.

Si vous avez un lymphome primitif du système nerveux central ou un lymphome des cellules NK ou T, il sera nécessaire d'entreprendre une ponction lombaire pendant la phase de sélection de l'étude. Selon les résultats de cet examen et l'évolution de vos symptômes d'autres ponctions pourraient être nécessaires au cours de votre traitement. La ponction lombaire consiste en l'introduction d'une aiguille dans le bas du dos afin de récupérer du liquide céphalo-rachidien. L'examen se déroule le plus souvent à l'hôpital, sous anesthésie locale profonde et est en général sans douleur. Il peut néanmoins apparaître dans le pire des cas un fort mal de tête ou des nausées. En effet, lorsque l'on extrait du liquide céphalo-rachidien, le cerveau est alors moins porté et pèse plus lourd dans la boîte crânienne. Afin de limiter ces inconvénients, il est recommandé de boire beaucoup d'eau et de rester couché pendant plusieurs heures après l'examen. Dans certains cas, un syndrome post-ponction lombaire peut survenir. Il se traduit par des maux de tête, des bourdonnements d'oreille ou des douleurs dans le cou. Ces signes cliniques disparaissent généralement en position couchée. Cela ne dure généralement pas plus de quelques jours.

Si vous avez un lymphome des cellules NK ou T, il sera également nécessaire de pratiquer des prélèvements de moelle osseuse consistant en une aspiration (ce prélèvement est appelé myélogramme) et/ou un prélèvement avec une aiguille creuse dans l'os iliaque effectué sous anesthésie locale (ce prélèvement est appelé biopsie médullaire) pour vérifier si la moelle est atteinte. Ces examens pourront être amenés à être répétés si nécessaire en fonction de l'évolution de votre maladie. La ponction et l'aspiration de la moelle osseuse peuvent être douloureuse et provoquer un gonflement et très rarement un saignement interne potentiellement grave. Les risques potentiels liés à la biopsie médullaire comprennent des saignements persistants, une infection, des douleurs et une réaction à l'anesthésie locale ou à la sédation, y compris une réaction allergique ou des nausées.

Pour les examens radiologiques :

a) Scanner spiralé

*Document en double : conserver l'original signé dans le classeur investigateur et remettre le double au participant à la recherche*

Les scanners spiralés induisent une exposition à des radiations aux rayons X. La quantité de radiation est variable en fonction du type de et du modèle de scanner. L'exposition aux radiations étant variable, les risques sont aussi variables. Discutez avec votre radiologue ou le médecin qui vous a prescrit le scanner si vous souhaitez obtenir des détails spécifiques sur les risques possibles dus à ces expositions.

Les réactions allergiques dues aux produits de contraste employés lors de la réalisation de scanners sont rares et peuvent se traduire par des démangeaisons ou des éruptions cutanées. Dans les cas sévères, vous pouvez avoir des difficultés à respirer et une baisse dangereuse de votre pression artérielle. Signalez à votre médecin investigateur ou à votre radiologue toute allergie connue aux produits de contraste, à l'iode ou aux crustacés.

#### b) IRM

Afin de bien voir les images de votre corps, un produit de contraste vous sera injecté par voie intraveineuse. Une IRM sera réalisée avant et après l'injection du produit de contraste. Votre médecin investigateur et le technicien IRM pourront vous donner plus de détails sur l'examen et le produit de contraste. Les risques liés à la procédure et au produit de contrastes sont les suivants : claustrophobie, douleur à l'endroit de l'injection (due à l'aiguille), brûlure à l'endroit de l'injection (si le produit est en contact avec la peau), maux de tête, vertiges ou évanouissement, diminution de votre pression artérielle, nausées, vomissements, transpiration. Une réaction allergique au produit de contraste est rare. Les objets en métal pourraient être affectés par le champ magnétique puissant, il est important d'informer votre médecin investigateur si vous avez des implants.

#### c) TEP

Si vous avez un lymphome des cellules NK ou T, il sera nécessaire d'entreprendre aussi un examen TEP au moment des examens radiologiques. Le TEP mesure l'utilisation du sucre (sucre radiomarqué appelé le fluoro-déoxyglucose ( $^{18}\text{F}$ )-FDG)) par les lésions cancéreuses présentes dans différentes parties du corps. Quand les traitements sont efficaces, la consommation

du  $^{18}\text{F}$ -FDG par les tumeurs diminue ou est complètement abolie. Les caractéristiques de l'isotope radioactif utilisé dans cet examen, le fluor-18 ( $^{18}\text{F}$ ), font que la radioactivité disparaît très rapidement et complètement de votre corps, en une demi-journée. Les traceurs radioactifs sont couramment utilisés et depuis plusieurs dizaines d'années sans risque pour la réalisation de scintigraphies en Médecine Nucléaire. Les effets indésirables liés à la technique dans son ensemble sont ceux des radiations ionisantes mais sont faibles compte-tenu des doses utilisées qui sont équivalentes à celles de quelques clichés radiologiques standards, et inférieures à celles délivrées lors d'un examen scanner de routine (scanner spiralé).

Pour que le produit reste stable, il comporte une quantité limitée d'alcool, très inférieure à celle contenue dans un verre de bière. L'injection de  $^{18}\text{F}$ -FDG ne va donc pas entraîner une élévation significative de votre taux d'alcool sanguin. Cependant, si vous êtes ou avez été dépendante de l'alcool, si vous êtes intolérante à l'alcool, ou si vous êtes sous traitement pour sevrage alcoolique, il faut nous le signaler. Par précaution, nous vous recommandons également de ne pas utiliser votre véhicule dans les 2 heures suivant l'injection de  $^{18}\text{F}$ -FDG. Enfin, et comme pour tous les examens diagnostiques qui utilisent des rayonnements, il peut y avoir un risque pour le fœtus chez les femmes enceintes. Ainsi, si vous êtes en âge de procréer, vous devez disposer d'un moyen de contraception efficace.

## 7. Pourquoi réaliser et conserver des prélèvements biologiques ?

En plus des recherches biologiques qui viennent d'être décrites dans ce document, il est possible que d'autres investigations susceptibles de faire progresser les connaissances sur le fonctionnement des cellules cancéreuses soient menées ultérieurement sur vos échantillons, sauf

*Document en double : conserver l'original signé dans le classeur investigateur et remettre le double au participant à la recherche*

si vous vous y opposez. Elles seront faites sur des fragments de tumeurs non entièrement utilisés et conservés à cet effet, ou bien sur des échantillons de la tumeur initiale retirée chirurgicalement et conservée depuis le diagnostic de votre cancer, ou bien sur des échantillons sanguins prélevés au cours de l'étude.

Pour mener ces recherches additionnelles, il est essentiel de pouvoir disposer de ces échantillons biologiques et de pouvoir les conserver intact pendant plusieurs années. C'est pourquoi, lors de la biopsie, une partie des fragments tumoraux collectés seront conservés, dans la paraffine pendant toute la durée de l'étude et au-delà.

En ce qui concerne la biopsie initiale qui a suivi l'annonce du cancer, il est probable que des fragments aient été conservés pour la recherche. Avec votre accord, un échantillon sera récupéré pour mener ces recherches.

## **8. Qu'en est-il de la contraception, et de la survenue d'une grossesse au cours de cette étude ?**

Il n'existe pas de données sur l'utilisation de Pembrolizumab chez la femme enceinte. Cependant les études faites sur les animaux (souris) montrent une augmentation des interruptions prématurées de gestation.

### **Si vous êtes une femme susceptible d'avoir des enfants**

#### Méthode de contraception

Le Pembrolizumab ne doit pas être utilisé pendant la grossesse. C'est pourquoi vous devrez faire un test de grossesse urinaire ou sanguin dans les 72 heures avant la première administration du Pembrolizumab et vous devrez utiliser une méthode de contraception adéquate pendant toute la durée de cette étude et jusqu'à 5 mois après la dernière administration du Pembrolizumab.

Cette méthode doit être discutée avec le médecin investigateur et doit présenter un risque de grossesse faible. De plus, il vous sera demandé d'informer votre médecin investigateur si vous changez de méthode de contraception pendant l'étude. Si besoin, votre médecin investigateur pourra vous prescrire une contraception adaptée.

#### Suspicion de grossesse

Si en cours d'étude, vous débutez une grossesse, pensez être enceinte, avez un retard de règles ou observez un changement au niveau de votre cycle menstruel (comme des saignements plus importants pendant les règles ou des saignements entre les cycles), vous devrez contacter immédiatement le médecin investigateur.

#### Grossesse survenant en cours d'étude

En cas de grossesse, le traitement par Pembrolizumab sera arrêté. Le médecin investigateur vous orientera vers un obstétricien pour le suivi de votre grossesse, qui sera prise en charge de façon habituelle. Vous continuerez à être suivie pour tout évènement indésirable ou bénéfice lié au produit à l'étude, sous réserve que ce suivi ne présente pas de danger pour vous et votre enfant à naître.

#### Allaitement

A ce jour il n'existe aucune information permettant de savoir si les petites quantités de produit à l'étude qui peuvent être présentes dans le lait maternel présentent un danger pour votre enfant. Vous ne devez donc pas allaiter pendant toute la durée du traitement.

**Si vous êtes un homme ayant une partenaire susceptible d'avoir des enfants**

Les partenaires sexuelles des hommes participant à cette étude peuvent être exposées au produit à l'étude car de petites quantités peuvent être présentes dans le sperme. Pour cette raison, vous devez informer votre (vos) partenaire (s) sexuelles de votre participation à l'étude.

Vous devez également utiliser une méthode de contraception adéquate pendant toute la durée de cette étude et jusqu'à 7 mois après la dernière administration du Pembrolizumab afin d'éviter la survenue d'une grossesse chez votre (vos) partenaire (s) sexuelles. Cette méthode doit être discutée avec le médecin investigateur et doit présenter un risque de grossesse faible.

Il vous est demandé d'informer votre médecin investigateur si votre partenaire débute une grossesse pendant votre participation à cette étude. Votre médecin investigateur vous demandera l'autorisation, ainsi qu'à votre partenaire, de suivre l'évolution de la grossesse et transmettra certaines informations au promoteur. Ces informations seront utilisées pour conseiller d'autres femmes qui pourraient être enceintes sous la prise des produits à l'étude.

**9. Est-il possible de prendre d'autres médicaments pendant l'étude ?**

Certains médicaments ne doivent pas être associés avec le Pembrolizumab. Vous devrez donc signaler à votre médecin investigateur quels sont les médicaments qui vous ont été prescrits par un autre médecin mais également ceux que vous prenez sans prescription et ceux à base de plantes.

L'équipe médicale de l'essai reste bien sûr à votre disposition pour toute question ou information supplémentaire.

**10. Quels sont mes droits en tant que participant à cette recherche ?****Vous êtes libre d'accepter ou de refuser de participer à cette recherche.**

Si vous acceptez d'y participer, nous vous demandons d'être affilié ou bénéficiaire d'un régime de sécurité sociale et de signer le formulaire de consentement joint à cette notice d'information.

Si vous donnez votre approbation pour ces recherches, cela implique également que vous acceptez la conservation des prélèvements biologiques et leurs dérivés (ADN, ARN et protéines extraits de la tumeur) pendant plusieurs années.

Une partie du matériel biologique et des données cliniques qui y sont associées pourront être transférées dans le cadre d'un partenariat de recherche avec d'autres institutions/organismes universitaires, académiques ou privés en accord avec la Loi de Bioéthique du 6 août 2004, y compris des organismes situés à l'étranger dans le cadre de cette étude et, sauf si vous vous y opposez, pour d'autres études s'intéressant à l'oncologie. Le matériel et les données ne seront utilisés qu'à des fins de recherche dans le domaine du cancer.

Ces transferts seront effectués dans des conditions assurant la confidentialité des échantillons et de vos données. Les données comportant votre nom ne seront pas transmises avec les prélèvements, elles seront identifiées par un numéro de code.

On ne peut exclure que les résultats obtenus par l'utilisation de matériels biologiques puissent conduire à l'obtention de droits exclusifs reposant sur des découvertes liées à la recherche. Vous ne recevrez aucune contrepartie financière. Au cas où le promoteur de l'étude bénéficierait d'un financement, il serait réinvesti dans la recherche pour le cancer dans le seul but d'en améliorer le traitement.

Si vous souhaitez vous retirer volontairement de l'étude, vous pourrez mettre fin à votre participation à tout moment sans avoir à expliquer votre choix. En aucun cas, cela n'aura de conséquence sur la suite de votre traitement, la qualité des soins qui vous seront fournis ou sur la relation avec votre médecin investigateur ; vous pourrez être suivi(e) par la même équipe médicale. Le promoteur pourra utiliser les informations et les échantillons recueillis jusque-là, sauf opposition de votre part formulée au moment de ce retrait. De même, à tout moment de l'étude, vous gardez la possibilité de demander la destruction de ces prélèvements biologiques.

### 11. Serais-je informé des résultats de l'étude ?

Les données de cette étude ne seront utilisées qu'à des fins de recherche. Il est probable que les résultats des recherches sur les matériels biologiques ne soient pas disponibles dans un avenir proche. En effet, la recherche peut être longue, les prélèvements et les données doivent être recueillis auprès de nombreux donneurs avant que les résultats ne soient connus.

Les résultats de ces recherches peuvent faire l'objet de publications scientifiques mais vos informations seront toujours présentées de façon anonyme.

Votre médecin investigateur sera informé des résultats de l'étude et pourra vous renseigner si vous le souhaitez.

### 12. De quelle protection bénéficierai-je dans le cadre de cette étude ?

#### a) Sécurité, éthique et prise en charge

Le promoteur de cet essai qui en assure la gestion et la responsabilité est **UNICANCER**—situé au 101, rue de Tolbiac, 75654 Paris Cedex 13 – France.

**UNICANCER** a pris toutes les dispositions prévues par la loi relative à la protection des personnes se prêtant à des recherches impliquant la personne humaine, n°2012-300 du 5 mars 2012 relative aux recherches impliquant la personne humaine conformément à l'Ordonnance 2016-800 du 16 juin 2016, Article 8.

Le promoteur devant assumer l'indemnisation des éventuelles conséquences dommageables de la recherche impliquant la personne humaine pour la personne qui s'y prête, a souscrit une assurance de recherches impliquant la personne humaine, conformément à la législation en vigueur (n° de contrat 0100713714024-140004-10998), auprès de la Société HDI-GERLING (**Tour OPUS 12 - La Défense 9, 77 Esplanade de la Défense – 92914 PARIS LA DEFENSE Cedex**) par l'intermédiaire de la société de courtage d'assurances Biomedic Insure (Parc d'Innovation Bretagne Sud, 56038 Vannes, tél. 02.97.69.19.19).

Lorsque la responsabilité du promoteur n'est pas engagée, les participants peuvent être indemnisés auprès de l'ONIAM, (*Office National d'Indemnisation des Accidents Médicaux*, N° Azur : 0810 600 160).

Les modalités de ce protocole ont été soumises à autorisation de 2 instances lesquelles ont pour mission de vérifier la pertinence scientifique de l'essai, les conditions requises pour votre protection et le respect de vos droits :

1) L'Autorité Compétente (Agence Nationale de Sécurité du Médicament et des produits de santé (ANSM)) a autorisé cet essai le 03 avril 2017 sous le n°**170059A-12**.

2) Le Comité de Protection des Personnes – *EST IV* a rendu un avis délibératif favorable le 14 mars 2017.

Conformément aux recommandations du Plan Cancer 2014-2019 (Action 5.4. Associer les patients et leurs représentants aux essais cliniques et dans le parcours permettant l'accès à ces recherches), ce document a été soumis pour relecture, avis et conseil au comité de patients de la Ligue contre le cancer.

Votre médecin généraliste traitant sera informé de votre participation à ce protocole de recherche, sauf opposition de votre part.

Les recherches ne donneront pas lieu à la communication de résultats individuels. Les résultats obtenus pourront faire l'objet de publications scientifiques mais ils ne seront pas disponibles immédiatement dans la mesure où il faut suffisamment de temps pour analyser toutes les données.

Selon les dispositions de l'article L.1122-1 du Code de la santé publique, vous serez informé(e), à votre demande, des résultats globaux de l'essai, en faisant la demande auprès du ou des médecins qui auront assuré votre suivi médical tout au long de l'essai.

#### **b) Protection des données vous concernant**

Dans le cadre de cette recherche, votre dossier médical, soumis au secret professionnel, restera **confidentiel** et ne pourra être consulté que sous la responsabilité du médecin investigateur s'occupant de votre prise en charge ainsi que par les autorités de santé et par des personnes dûment mandatées par le promoteur de l'essai dans le cadre du contrôle et de l'assurance de la qualité.

Dans le cadre de la recherche à laquelle il vous est proposé de participer, un traitement confidentiel de vos données personnelles va être mis en œuvre pour permettre d'analyser les résultats de cette recherche menée dans l'intérêt public dans le domaine de la santé publique (articles 6.1.e et 9.2.i du Règlement (UE) n° 2016/679).

Par conséquent, les données nécessaires pour répondre aux questions scientifiques de cette recherche seront collectées, envoyées et traitées par UNICANCER, le promoteur, et ses prestataires dans le strict cadre de la réalisation de leurs missions.

Les données relatives aux événements indésirables dans le cadre de l'essai pourront être transmises à MSD France – 34 avenue Léonard de Vinci – 92400 Courbevoie dans le but afin de consolider les informations de sécurité sur le médicament KEYTRUDA (Pembrolizumab).

Aucun transfert de données personnelles en dehors de l'Union européenne n'est prévu à ce stade durant la recherche.

En cas de nécessité de transfert de données hors de l'Union Européenne [ou vers un pays ne garantissant pas un niveau de protection suffisant par rapport à l'Union Européenne ou à une organisation internationale], UNICANCER respectera les garanties appropriées décrites au chapitre 5 du RGPD. Vous serez informé des conditions de transfert des données, des garanties appropriées pour protéger vos données et de l'endroit où ces garanties seront mises à disposition par le biais du site internet <http://mesdonnees.unicancer.fr/>.

Les données vous concernant seront traitées de manière confidentielle pour permettre d'analyser les résultats de la recherche. Ces données ne feront pas apparaître votre identité et seront identifiées par un numéro de code. Les informations concernant votre identité seront conservées par votre médecin investigateur.

*Document en double : conserver l'original signé dans le classeur investigateur et remettre le double au participant à la recherche*

Si vous l'acceptez, les données collectées durant l'essai pourront être utilisées de manière confidentielle et sécurisée par UNICANCER ou ses partenaires afin de poursuivre la recherche contre le cancer ou d'améliorer l'accès aux thérapies dans le cadre strict de poursuite de la recherche scientifique (articles 6.1.f et 9.2.j du Règlement (UE) n° 2016/679).

Pour vous permettre de connaître pour quels autres projets menés dans le domaine de la santé vos données sont utilisées, UNICANCER met à votre disposition un site internet d'information : <http://mesdonnees.unicancer.fr/>

Vos données seront conservées, avec des habilitations d'accès précises, jusqu'à deux ans après la dernière publication des résultats de la recherche ou, en cas d'absence de publication, jusqu'à la signature du rapport final de la recherche.

Vos données seront ensuite archivées avec un accès restreint pour un minimum de quinze ans à compter de la fin de la recherche à laquelle vous participez, conformément à la réglementation en vigueur en matière d'essai clinique.

Vous disposez des droits suivants relatifs aux données vous concernant, dans les conditions prévues par la réglementation en vigueur :

- droits d'accès aux données vous concernant,
- droit de rectification des données erronées,
- droit à l'effacement des données conformément aux dispositions de l'article 17 du RGPD,
- droit de limitation du traitement des données conformément aux dispositions de l'article 18 du RGPD,
- droit de limitation du traitement de vos données, notamment si ce traitement venait à être remis en cause.

Vous disposez également d'un droit d'opposition au traitement des données. Celui-ci empêche notamment toute collecte ultérieure des données par le responsable de traitement.

Toutefois, si l'exercice du droit d'effacement ou droit d'opposition contreviennent aux objectifs de la recherche et à l'intégrité des données nécessaire à l'évolution des connaissances biologiques et médicales, UNICANCER pourra ne pas répondre favorablement à l'exercice de ces droits.

Ces droits s'exercent auprès du délégué à la protection des données UNICANCER : Délégué à la protection des données, 101 rue de Tolbiac 75654 Paris Cedex 13 – [dpo@unicancer.fr](mailto:dpo@unicancer.fr)

Il est conseillé – mais ce n'est pas une obligation – préalablement à l'exercice de vos droits, de contacter le médecin investigateur qui vous suit dans la recherche afin qu'il vous communique votre numéro d'identification et l'identifiant du centre qui sont spécifiques à la recherche. Ces éléments vous permettront de communiquer plus facilement avec le Délégué à la protection des données.

Vous pouvez également accéder directement ou par l'intermédiaire d'un médecin de votre choix à l'ensemble des informations concernant votre santé en application des dispositions de l'article L.1111-7 du Code de la Santé Publique.

Si malgré l'engagement d'UNICANCER, à respecter vos droits et à protéger les données vous concernant, vous restez insatisfait, il vous est possible d'introduire une réclamation auprès de l'autorité de contrôle : la Commission nationale de l'informatique et des libertés (cnil.fr).

### **c) Droits relatifs aux échantillons biologiques**

Conformément à la Loi n° 2004-800 du 6 août 2004 modifiée relative à la bioéthique, le prélèvement de sang et l'utilisation de vos tissus tumoraux et/ou prélèvements sanguins pour examen de vos caractéristiques génétiques sont soumis à votre accord écrit préalable.

*Document en double : conserver l'original signé dans le classeur investigateur et remettre le double au participant à la recherche*

D'autre part, si vous ne vous y opposez pas, ceux-ci seront conservés par un centre assurant leur préservation et leur confidentialité, conformément à la réglementation en vigueur, pour des recherches ultérieures dans le domaine de l'oncologie, y compris en génétique, tant que ces prélèvements conserveront un intérêt scientifique et pour un minimum de vingt-cinq ans à compter de la fin de la recherche à laquelle il vous est proposé de participer. Vous pouvez toutefois vous y opposer si vous le désirez en le précisant oralement ou par écrit à votre médecin investigateur.

Par ailleurs, à tout moment de la recherche vous pouvez demander à votre médecin investigateur la destruction ou le retour des échantillons ayant été recueillis dans le cadre du soin de votre maladie.

Une partie du matériel biologique pourra être transférée dans le cadre d'un partenariat de recherche à d'autres institutions ou à des sociétés privées en accord avec la Loi de Bioéthique du 6 août 2004 modifiée.

Si, au cours de l'analyse de ces échantillons, une anomalie génétique grave liée ou non à votre maladie était diagnostiquée, votre médecin vous informera de ce diagnostic, de la prise en charge médicale associée et de la possibilité de contacter des associations de patients touchés par cette anomalie. Vous serez alors tenu d'informer les membres de votre famille potentiellement concernés ou de demander par écrit à votre médecin de les informer. Si toutefois vous souhaitez être tenu dans l'ignorance d'un tel diagnostic, vous pouvez l'indiquer par écrit. Veuillez toutefois noter que ceci pourrait empêcher de prévenir des membres de votre famille également touchés par cette éventuelle anomalie et retarder la prise de mesures de prévention ou de soins. Vous pouvez autoriser votre médecin à informer lui-même ces membres de votre famille.

### 13. A qui dois-je m'adresser en cas de questions ou de problèmes ?

En cas de problèmes, d'événements indésirables en cours d'essai ou de questions, vous pouvez vous adresser aux personnes suivantes :

|                                                     |
|-----------------------------------------------------|
| <b>Vos contacts dans l'étude</b>                    |
| <i>(titre, nom, prénom, adresse et téléphone) :</i> |
| .....<br>.....                                      |
| <b>Coordonnées du médecin référent du patient</b>   |
| .....<br>.....                                      |

## 14. Tableau récapitulatif des investigations

| VISITE                                                                            | SELE<br>C | C1J1 | C2J1 | C3J1 | C4J1 | C5J1 | CnJ1... | FDT | SUIVI    |
|-----------------------------------------------------------------------------------|-----------|------|------|------|------|------|---------|-----|----------|
| Jours                                                                             | -28 - 0   | J1   | J22  | J43  | J64  | J85  | +Q 21 j |     | Q 3 mois |
| Consentement éclairé écrit                                                        | X         |      |      |      |      |      |         |     |          |
| Critères d'inclusion / non-inclusion vérifiés                                     | X         |      |      |      |      |      |         |     |          |
| Revue des antécédents médicaux, symptômes et traitements actuels                  | X         |      |      |      |      |      |         |     |          |
| <b>EVALUATIONS CLINIQUES</b>                                                      |           |      |      |      |      |      |         |     |          |
| Examen clinique complet                                                           | X         | X    | X    | X    | X    | X    | X       | X   |          |
| Recueil des toxicités / symptômes                                                 | X         | X    | X    | X    | X    | X    | X       | X   | X        |
| Prise de sang pour une analyse hématologique et biochimique                       | X         | X    | X    | X    | X    | X    | X       | X   |          |
| Test de grossesse pour les femmes en âge de procréer                              | X         | X    |      |      |      |      |         |     |          |
| Electrocardiogramme                                                               | X         |      |      |      |      |      |         |     |          |
| <b>EVALUATION DE LA MALADIE</b>                                                   |           |      |      |      |      |      |         |     |          |
| <b>Tumeurs solides</b>                                                            |           |      |      |      |      |      |         |     |          |
| Examen clinique                                                                   | X         |      |      |      |      | X    | X       | X   |          |
| Examen radiologique                                                               | X         |      |      |      |      | X    | X       | X   |          |
| Cancer des cellules germinales : prise de sang pour dosage des marqueurs tumoraux | X         | X    | X    | X    | X    | X    | X       | X   |          |
| <b>Lymphome primitif du SCN</b>                                                   |           |      |      |      |      |      |         |     |          |
| IRM cérébrale avec contraste                                                      | X         |      |      |      |      | X    | X       | X   |          |
| Examen radiologique thorax, abdomen et pelvis                                     | X         |      |      |      |      | X    | X       | X   |          |
| Examen ophtalmologique                                                            | X         |      |      |      |      | X    | X       | X   |          |
| Ponction lombaire                                                                 | X         |      |      |      |      | X    | X       | X   |          |
| <b>Lymphome des cellules NK ou T</b>                                              |           |      |      |      |      |      |         |     |          |
| Examen clinique                                                                   | X         |      |      |      |      | X    | X       | X   |          |
| Examen TEP associé à un scanner spiral                                            | X         |      |      |      |      | X    | X       | X   |          |
| Ponction lombaire                                                                 | X         |      |      |      |      | X    | X       | X   |          |
| Biopsie de la moelle osseuse ou myélogramme                                       | X         |      |      |      |      | X    | X       | X   |          |
| Prise de sang pour dosage anticorps EBV et taux de LDH                            | X         |      |      |      |      | X    | X       | X   |          |
| <b>COLLECTION DES ECHANTILLONS POUR LA RECHERCHE</b>                              |           |      |      |      |      |      |         |     |          |
| Echantillon de la tumeur                                                          | X         |      |      |      |      |      |         |     |          |
| Prélèvement du sang                                                               | X         | X    | X    | X    | X    |      |         |     |          |
| <b>TRAITEMENT DE L'ETUDE</b>                                                      |           |      |      |      |      |      |         |     |          |
| Administration du Pembrolizumab                                                   |           | X    | X    | X    | X    | X    | X       |     |          |
| <b>STATUT DU PATIENT</b>                                                          |           |      |      |      |      |      |         |     |          |

Document en double : conserver l'original signé dans le classeur investigateur et remettre le double au participant à la recherche

| VISITE                                                        | SELE<br>C | C1J1 | C2J1 | C3J1 | C4J1 | C5J1 | CnJ1... | FDT | SUIVI    |
|---------------------------------------------------------------|-----------|------|------|------|------|------|---------|-----|----------|
| Jours                                                         | -28 - 0   | J1   | J22  | J43  | J64  | J85  | +Q 21 j |     | Q 3 mois |
| Recueil des informations sur la prise de nouveaux médicaments |           |      |      |      |      |      |         |     | X        |

C= Cycle de traitement; EBV= virus *Epstein-Barr*; FDT= fin de traitement; J= Jour; j= jours; LDH= lactate déshydrogénase; Q= chaque; SELEC= période de sélection; SNC= système nerveux central; TEP= scanner de tomographie par émission de positons

## 15. Lexique

**Biomarqueur** - une caractéristique mesurable avec précision, utilisée comme indicateur d'une fonction du corps, d'une maladie ou de l'action d'un médicament

**Biopsie** - La biopsie consiste à prélever un fragment de tissu ou d'organe. Il sert à repérer les cellules cancéreuses, les examiner afin d'évaluer leur nature et leur degré d'agressivité et d'évaluer la façon dont des cellules cancéreuses pourraient réagir à un traitement

**Carcinome** - Un cancer développé à partir d'un tissu épithélial (tissu recouvrant la surface externe ou interne de divers organes).

**Immunologique** – associé au système immunitaire

**IRM** - L'imagerie par résonance magnétique (IRM) est un examen qui permet d'obtenir des vues en deux ou trois dimensions de l'intérieur du corps. L'IRM donne des informations sur des lésions qui ne sont pas visibles sur les radiographies standards, l'échographie ou le scanner.

**Médecin investigateur** – Un médecin qui dirige et surveille la réalisation de l'essai clinique dans l'hôpital et qui suit le traitement des patients dans le cadre de l'étude.

**Non-résécable** – ne peut pas être enlevé par chirurgie,

**Perfusion intraveineuse** - Une perfusion intraveineuse consiste à administrer des traitements médicamenteux dans une veine, une artère ou dans un cathéter via une poche contenant le traitement à administrer permet de le distribuer au goutte-à-goutte, de façon régulière.

**Ponction lombaire** - un examen médical qui consiste en l'introduction d'une aiguille dans le bas du dos afin de récupérer du liquide céphalo-rachidien, un liquide qui sert à protéger le cerveau en amortissant les chocs. Son analyse permet de détecter les potentielles traces d'une maladie ou d'une infection

**Promoteur** - la personne physique ou morale qui prend l'initiative de l'essai clinique

**Recherche impliquant la personne humaine** - une recherche organisée et pratiquée sur l'Être humain en vue du développement des connaissances biologiques ou médicales

**Scanner spiralé** - un appareil d'examen radiographique qui permet d'étudier et analyser les structures anatomiques d'un organe, en utilisant des rayons X.

**TEP** - un appareil d'examen radiographique qui mesure l'utilisation du sucre radiomarké (appelé le fluoro-déoxyglucose ([<sup>18</sup>F]-FDG)) par les lésions cancéreuses présentes dans différentes parties du corps. Quand les traitements sont efficaces, la consommation du [<sup>18</sup>F]-FDG par les tumeurs diminue ou est complètement abolie.

# FORMULAIRE DE RECUEIL DU CONSENTEMENT

## Accès sécurisé au Pembrolizumab pour des patients porteurs de certains types de cancers rares

Je soussigné :

Nom : ..... Prénom : .....

Adresse : .....

.....

Atteste par le présent consentement que :

- je suis titulaire / bénéficiaire d'un régime de sécurité sociale.
- j'ai pris connaissance de la note d'information m'expliquant le protocole de recherche mentionné ci-dessus.
- j'ai pu poser toutes les questions que je voulais, j'ai reçu des réponses adaptées et j'ai pu disposer d'un temps de réflexion suffisant entre l'information et la décision de ma participation à cette étude.
- j'ai bien noté que je serai libre à tout moment d'arrêter ma participation et que je dispose des droits cités au paragraphe 12 de la note d'information. Pour vous permettre de connaître pour quels autres projets ultérieurs menés dans le domaine de la santé vos données sont utilisées, UNICANCER met à votre disposition un site internet d'information: <http://mesdonnees.unicancer.fr/>
- j'ai compris qu'en acceptant de participer à cette étude, je consens spécifiquement à l'analyse de mes caractéristiques génétiques.

| Compte-tenu des informations qui m'ont été transmises :<br><i>cocher les cases appropriées en fonction de votre volonté (OUI/NON)</i>                                                                                                                                                                                      | OUI                      | NON                      |
|----------------------------------------------------------------------------------------------------------------------------------------------------------------------------------------------------------------------------------------------------------------------------------------------------------------------------|--------------------------|--------------------------|
| 1) J'accepte librement et volontairement de participer à la recherche impliquant la personne humaine <sup>(a)(b)</sup> <b>AcSé PEMBROLIZUMAB</b> qui implique que des échantillons de tissus tumoraux et de sang soient prélevés, stockés et utilisés pour une recherche au niveau protéique et génétique <sup>(c)</sup> . | <input type="checkbox"/> | <input type="checkbox"/> |
| 2) Je consens à l'utilisation de la tumeur diagnostique archivée et j'autorise l'utilisation du matériel biologique extrait (ADN, ARN, protéines) à des fins de recherche.                                                                                                                                                 | <input type="checkbox"/> | <input type="checkbox"/> |

<sup>(a)</sup> n°2012-300 du 5 mars 2012 relative aux recherches impliquant la personne humaine conformément

<sup>(b)</sup> loi n° 78-17 du 6/01/1978 relative à l'informatique, aux fichiers et aux libertés modifiée.

<sup>(c)</sup> loi n° 2004-800 du 6/08/2004 relative à la bioéthique.

| <b>Partie à remplir par le (la) patient(e)</b>                                                                                                                                                                                                                                                                                                                                                                                                                                                                                                                                                                                                                                                                                                                         | <b>Partie à remplir par l'investigateur</b>                                                                                                                                                                                                                                                                                                                                                                                                                                                                                                                                                                                                                                                                                                                            |
|------------------------------------------------------------------------------------------------------------------------------------------------------------------------------------------------------------------------------------------------------------------------------------------------------------------------------------------------------------------------------------------------------------------------------------------------------------------------------------------------------------------------------------------------------------------------------------------------------------------------------------------------------------------------------------------------------------------------------------------------------------------------|------------------------------------------------------------------------------------------------------------------------------------------------------------------------------------------------------------------------------------------------------------------------------------------------------------------------------------------------------------------------------------------------------------------------------------------------------------------------------------------------------------------------------------------------------------------------------------------------------------------------------------------------------------------------------------------------------------------------------------------------------------------------|
| Nom et prénom :                                                                                                                                                                                                                                                                                                                                                                                                                                                                                                                                                                                                                                                                                                                                                        | Nom et prénom :                                                                                                                                                                                                                                                                                                                                                                                                                                                                                                                                                                                                                                                                                                                                                        |
| Date :<br><br><div style="display: flex; justify-content: space-between; width: 100%;"> <div style="border-bottom: 1px solid black; width: 10%;"></div> </div> <div style="display: flex; justify-content: space-between; width: 100%;"> <span>Jour</span> <span>Mois</span> <span>Année</span> </div> | Date :<br><br><div style="display: flex; justify-content: space-between; width: 100%;"> <div style="border-bottom: 1px solid black; width: 10%;"></div> </div> <div style="display: flex; justify-content: space-between; width: 100%;"> <span>Jour</span> <span>Mois</span> <span>Année</span> </div> |
| Signature : <i>(avec la mention lu, compris et approuvé)</i>                                                                                                                                                                                                                                                                                                                                                                                                                                                                                                                                                                                                                                                                                                           | Signature :                                                                                                                                                                                                                                                                                                                                                                                                                                                                                                                                                                                                                                                                                                                                                            |

Document en duplicate : l'original signé sera conservé pendant 15 ans par l'investigateur ; le double sera remis au participant à la recherche
