# Supplementary figures and images for: Pembrolizumab in patients with rare ovarian cancers : analysis from AcSé Pembrolizumab phase II multicentric basket trial
Source: Research Square preprint supplement (doi:10.21203/rs.3.rs-7752410/v1), 2025-10-05

**Supplementary Figure 1. Flow chart**

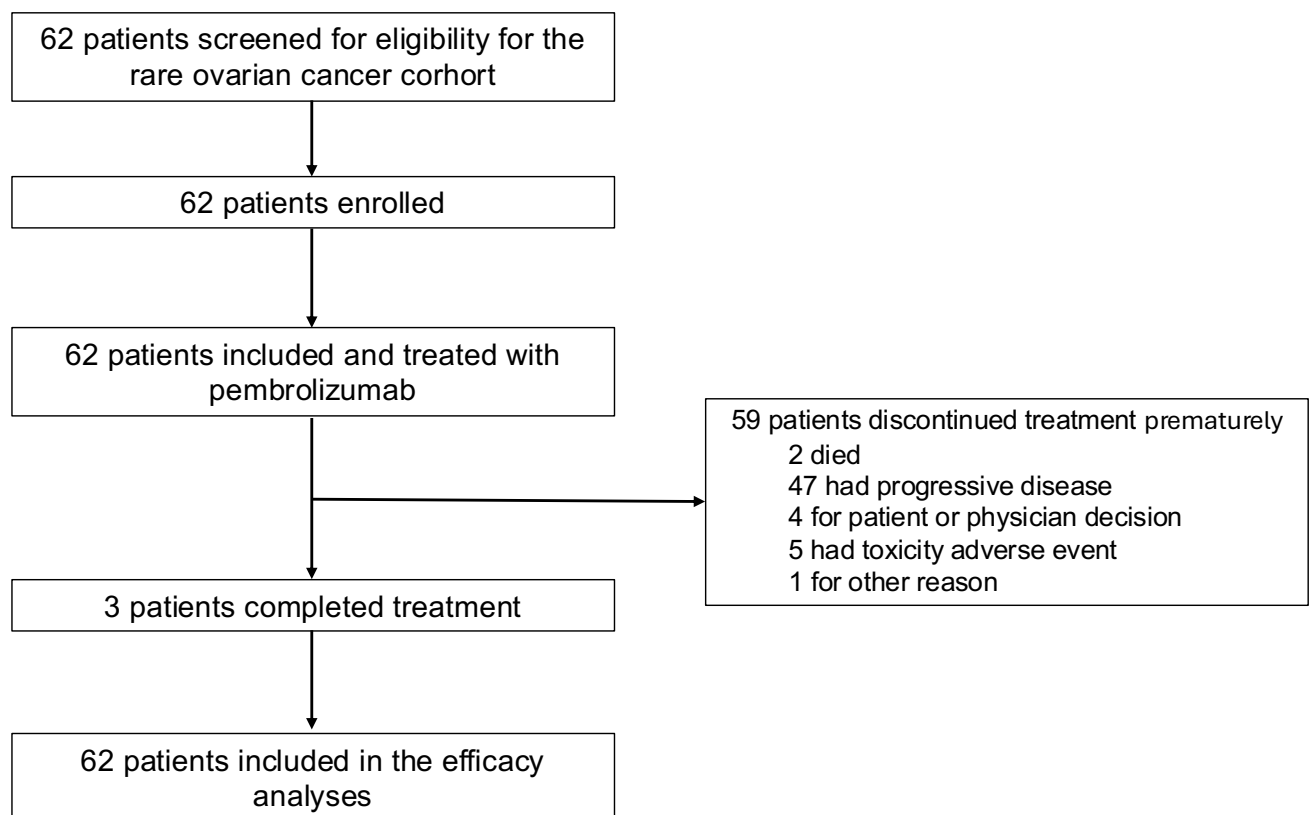

Supplement: Supplementary file 2 [file 6df7831d0b1d382d3a903d23.pdf]

Supplementary Figure 2. Duration of treatment response in the intention to treat population

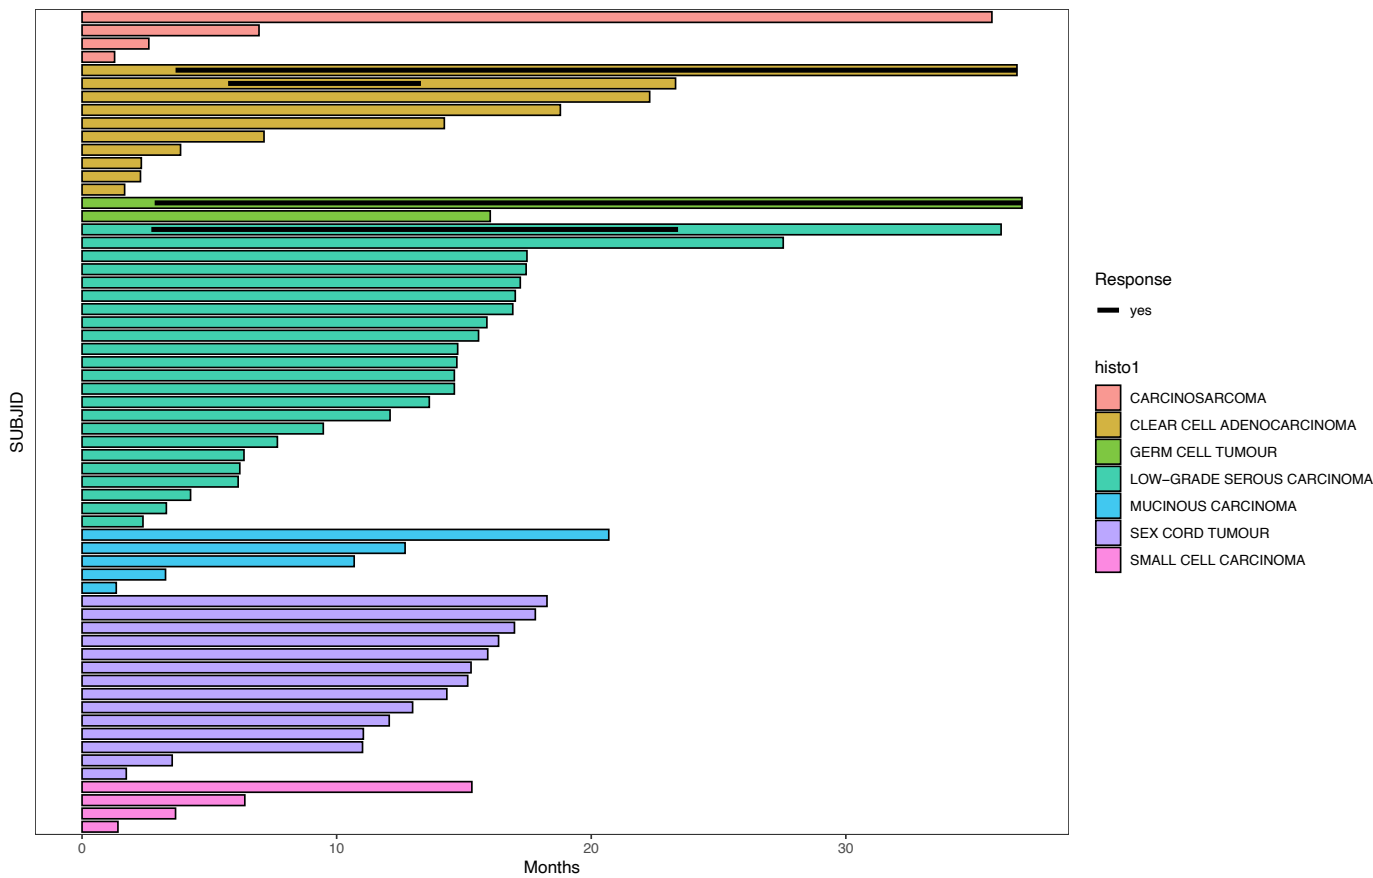

Supplement: Supplementary file 3 [file 73af257e7a2aa9be4a7da7c8.pdf]
